# Supplementary material for: Internal standards in inductively coupled plasma mass spectrometry using kinetic energy discrimination and dynamic reaction cells
Source: Royal Society of Chemistry journal article supplement (doi:10.1039/c8ja00171e), 2018-01-01
Supplement: c8ja00171e1.xlsx [file c8ja00171e1.xlsx]

## Sheet: Max error tables
		HNO3, Maximum error in % KED-mode									HNO3, Maximum error in % DRC-mode								HNO3, Maximum error in % Standard-mode
		None	Be	Ga	Y	Rh	In	Ir	Tl			None	Ga	Rh	In	Tl			None	Be	Ga	Y	Rh	In	Ir	Tl
	Mg 24	60.2539	32.808	-9.67314	-10.6625	12.1051	10.2155	20.5717	14.4802		Mg 24	62.1	9.62592	11.2902	7.61379	9.671		Mg 24	95.0004	77.1722	20.0798	19.7474	24.6138	27.4808	28.115	22.5783
	Al 27	87.7535	53.6044	-30.8143	-31.3581	-30.777	-30.5164	40.1566	32.9686		Al 27	102.073	35.7944	38.0818	33.1559	34.1434		Al 27	139.09	114.956	45.11	44.1691	49.755	53.2625	52.2977	46.2402
	Ti 49	36.4593	14.7842	-7.96293	-8.28138	-4.23511	-5.87992	3.0954	-2.14278		V 51	39.8683	-8.24092	-6.33816	-8.82874	-4.3188		Ti 49	69.856	54.3894	4.64187	4.44286	8.71203	11.1881	11.9199	7.66246
	V 51	43.9313	20.4246	-2.69869	-3.05989	1.72799	1.95406	8.93607	4.82715		Mn 55	48.435	-1.13772	2.24336	-1.79081	6.38193		V 51	67.1858	52.7803	3.75997	3.6916	8.01557	10.4793	11.7821	7.5922
	Mn 55	45.7907	21.9504	-1.45752	-1.82083	2.53705	1.07245	10.3241	4.80965		Co 59	35.2498	-13.3093	-11.5173	-13.8452	-7.57545		Mn 55	64.0845	49.7848	1.68671	1.60721	5.83029	8.23785	10.6984	6.53316
	Co 59	42.7529	19.4578	-3.48646	-3.84606	0.611341	-1.29628	8.0556	3.6762		Ni 61	14.6391	-22.4514	-21.3146	-23.7879	-22.0207		Co 59	61.4073	47.6419	0.92529	2.03937	4.91082	6.83866	11.3075	7.14085
	Cu 65	31.0712	9.48481	-13.7396	-14.7275	-13.3745	-13.1755	-9.81181	-10.6466		Cu 65	22.8433	-22.1743	-20.4267	-22.3184	-16.238		Ni 61	31.851	19.847	-18.7884	-18.9076	-15.5844	-13.6674	-13.1325	-16.8878
	Zn 67	-26.2261	-26.448	-40.4632	-40.6549	-38.0638	-39.1248	-33.6114	-36.7056		Zn 67	-33.8377	-41.6264	-40.7894	-42.6197	-41.2472		Cu 65	44.2918	31.8079	-12.7425	-11.7252	-9.19996	-7.9833	-3.65988	-7.99332
	As 75	-4.50127	-18.5676	-34.169	-34.404	-31.5027	-32.6787	-26.3009	-29.9889		As 75	-6.14179	-30.3028	-29.1887	-31.3822	-29.8998		Zn 67	-19.876	-17.2326	-41.461	-41.5515	-39.1637	-37.7928	-37.4719	-40.1378
	Se 82	-23.1425	-38.0597	-49.2024	-49.2376	-47.2111	-48.1056	-43.2309	-46.1795		Se 82	-13.4379	-32.1381	-31.1487	-33.3024	-31.7262		As 75	7.0814	-2.14935	-33.5449	-33.5845	-30.8143	-29.2386	-28.4377	-31.6667
	Cd 111	8.84254	-8.94682	-26.4236	-26.6977	-23.4381	-24.7531	-17.6242	-21.7432		Cd 111	12.6753	-23.3766	-22.3351	-24.7879	-22.8019		Se 82	-14.9978	-19.6035	-45.513	-45.6043	-43.3832	-42.1079	-41.81	-44.2902
	Pb 208	38.8786	16.2149	-6.10555	-6.45599	-3.70801	-3.97422	5.12416	-0.772465		Pb 208	44.947	-6.45551	-4.50284	-7.07533	-0.69207		Cd 111	16.2646	6.35683	-27.7388	-27.7722	-24.7496	-23.0321	-22.0816	-25.6305
																		Pb 208	54.9486	41.7442	-5.8424	-4.80267	-2.12295	2.57679	3.85836	-0.886413
		PBS, Maximum error in % KED-mode									PBS, Maximum error in % DRC-mode								PBS, Maximum error in % Standard-mode
		None	Be	Ga	Y	Rh	In	Ir	Tl			None	Ga	Rh	In	Tl			None	Be	Ga	Y	Rh	In	Ir	Tl
	Mg 24	-20.3406	-12.4904	6.86606	-7.04848	4.80731	-5.83439	-9.12095	8.94689		Mg 24	-38.4698	-26.0631	-8.6415	-21.1245	-6.06922		Mg 24	-37.9102	-12.8611	-9.09597	-14.9321	4.34318	-5.88311	-2.13477	9.22661
	Al 27	-18.3051	-11.1834	4.38489	-7.39188	6.00895	-4.17419	-8.4281	9.44504		Al 27	-26.141	12.2396	21.3212	9.83156	18.6842		Al 27	-39.8793	-19.0929	-15.933	-21.757	-11.1807	-12.8862	-9.25759	1.76817
	Ti 49	-5.61298	10.6406	18.1288	8.80508	22.0212	16.5457	10.7166	25.8992		V 51	60.0362	117.708	146.85	125.174	141.075		Ti 49	-18.9489	9.19675	13.7981	6.28972	20.8496	18.5342	26.0117	37.6183
	V 51	9.36676	12.2552	19.7308	10.3634	23.9067	18.2424	12.4754	27.8359		Mn 55	-12.2096	19.4998	35.5505	23.5775	32.405		V 51	-21.3031	8.93096	15.3	6.98263	21.1269	18.2206	25.9555	37.5594
	Mn 55	-15.6857	-8.16579	5.27583	-3.01812	8.94471	3.96563	-3.96256	12.3995		Co 59	-21.7687	-10.1521	21.8126	-12.1156	18.9583		Mn 55	-26.1345	-4.25539	4.37804	-3.62753	9.61441	7.63754	14.629	25.1398
	Co 59	-13.6584	-6.97304	7.74972	-1.15365	11.5509	6.43242	-2.71003	15.0826		Ni 61	-25.5888	-7.86808	-14.7363	-7.76013	-12.4687		Co 59	-23.7159	-2.43105	6.38421	0.700053	13.1543	11.1306	18.3982	29.2455
	Cu 65	-26.5127	-14.5293	-7.87114	-15.1833	-5.20904	-9.16691	-13.7706	-4.60531		Cu 65	-39.5648	-19.4963	-10.5276	-19.3641	-12.1675		Ni 61	-37.0252	-16.7428	-11.8245	-17.5776	-6.7486	-11.0738	-11.8671	-6.84084
	Zn 67	-28.2884	-15.7138	-9.99472	-17.1566	-7.23197	-11.3072	-15.8568	-4.24189		Zn 67	-38.5297	-16.642	-5.23957	-14.3379	-7.28969		Cu 65	-35.5015	-14.0859	-9.66532	-15.5208	-3.91068	-8.11692	-8.83987	9.65494
	As 75	15.4349	11.5162	18.9621	9.64241	23.0648	17.4596	11.7022	26.971		As 75	-42.2592	-45.234	-42.1093	-44.753	-41.6063		Zn 67	-36.6652	-14.2484	-10.6419	-16.4395	-4.97823	-6.88006	-7.67046	8.1959
	Se 82	26.0364	10.7653	20.4917	18.5516	22.28	20.1327	15.7047	23.6022		Se 82	-24.1653	3.29838	16.5309	5.40321	14.6406		As 75	-22.1984	6.66798	12.055	4.21884	18.5184	15.8756	23.4632	34.8183
	Cd 111	-23.6472	-10.655	-4.70217	-12.1506	5.65956	-5.87249	-10.449	6.8939		Cd 111	-35.4975	-12.13	7.91285	-9.1489	6.16949		Se 82	-27.834	3.19426	8.23994	5.75464	11.1232	5.96721	11.9009	22.1923
	Pb 208	-23.8197	-10.8408	-4.90834	-12.3419	-1.57097	-6.07972	-10.6482	1.54733		Pb 208	-33.2863	-9.14087	3.04459	-7.46642	0.640728		Cd 111	-32.4053	-9.57616	5.74756	-11.8697	5.04391	1.5425	4.8946	14.507
																		Pb 208	-41.5273	-21.7664	-18.4532	-23.7495	-13.2654	-14.8172	-9.24837	-1.06105
	Triton, Maximum error in % KED-mode										Triton, Maximum error in % DRC-mode								Triton, Maximum error in % Standard-mode
		None	Be	Ga	Y	Rh	In	Ir	Tl			None	Ga	Rh	In	Tl			None	Be	Ga	Y	Rh	In	Ir	Tl
	Mg 24	76.891	-20.3439	-7.94113	-8.37433	-5.98639	-7.00793	3.5085	0.656156		Mg 24	108.095	5.90308	-9.75195	-6.3174	4.50198		Mg 24	114.353	5.88629	-5.68711	-10.6425	-10.4072	8.38558	27.1124	12.8297
	Al 27	95.5282	21.0944	11.4624	11.2067	12.4872	10.9869	14.469	11.027		Al 27	190.741	65.4337	54.2825	56.0713	53.6113		Al 27	100.48	10.4337	11.1638	15.7677	16.0704	8.13139	22.6679	10.8915
	Ti 49	57.6664	-28.9054	-17.0258	-17.6345	-15.8253	-16.4625	-7.75498	-10.5336		V 51	112.231	-8.27991	-8.6273	-10.3585	-4.8788		Ti 49	134.574	16.3639	-3.05873	-5.34061	-4.17284	12.0475	27.1015	14.322
	V 51	72.317	-22.2526	-9.09122	-9.8042	-7.91396	-8.54375	2.3583	3.04437		Mn 55	102.226	1.36758	-11.5933	-8.73985	-6.77707		V 51	135.709	17.1628	-3.08901	-4.93608	-3.6202	12.1971	26.958	14.359
	Mn 55	77.9127	-19.7278	-6.15558	-6.88737	-4.93043	-5.58564	4.93361	3.59932		Co 59	107.448	-11.3967	-11.735	-13.3818	-8.11583		Mn 55	136.841	17.7109	-2.62338	-4.49432	-3.17751	12.7281	27.5585	14.8951
	Co 59	81.0778	-18.2981	-4.46139	-5.21269	-3.22853	-3.88821	6.45608	4.52812		Ni 61	89.6892	-13.5037	-17.2266	-15.5413	-12.0352		Co 59	142.406	20.5291	-0.702463	3.2026	3.12902	15.3165	30.4344	17.5177
	Cu 65	92.2954	-13.2557	2.57057	3.18384	2.89615	3.49973	12.4997	9.11617		Cu 65	112.515	-13.7264	-18.9523	-20.6451	-15.7884		Ni 61	110.781	-12.068	-12.4224	-14.5653	-13.5768	-8.91257	15.5328	-10.7874
	Zn 67	83.6105	-17.1165	-5.19414	-5.47834	-3.65359	-3.9727	7.60261	4.40472		Zn 67	107.962	-7.68705	-11.0494	-9.53588	-4.77255		Cu 65	159.124	28.8081	6.52764	4.50788	5.95798	23.3353	39.555	25.7099
	As 75	211.449	40.5159	64.211	62.9483	66.3958	65.2284	82.2176	76.7431		As 75	67.2519	-21.2054	-26.8953	-25.294	-24.8377		Zn 67	125.227	11.5753	-3.63228	-6.68967	-6.14814	12.4275	30.9246	16.5756
	Se 82	237.118	51.395	77.2763	76.0614	79.7163	78.4332	96.8887	90.8952		Se 82	259.675	75.9013	57.3666	62.4274	66.2164		As 75	313.941	105.779	70.2589	67.0086	69.3193	97.1272	123.123	100.965
	Cd 111	75.6563	-20.755	-7.3299	-8.05875	-6.1291	-6.77097	3.64269	4.33482		Cd 111	113.854	5.22715	-6.46805	-3.46784	8.22808		Se 82	403.417	149.922	107.242	102.878	105.548	139.698	171.328	144.295
	Pb 208	73.3841	-21.7686	-8.61774	-9.31585	-7.37486	-8.03816	1.44998	-1.59832		Pb 208	112.22	-3.65459	-7.34372	-5.86291	-2.13792		Cd 111	104.061	1.68311	-16.1792	-17.7123	-16.5521	5.53039	9.78147	3.52465
																		Pb 208	103.411	-2.32721	-16.2317	-17.862	-16.7349	-3.01356	9.85308	-1.07786
