# Supplementary material for: Internal standards in inductively coupled plasma mass spectrometry using kinetic energy discrimination and dynamic reaction cells
Source: Royal Society of Chemistry journal article supplement (doi:10.1039/c8ja00171e), 2018-01-01
Supplement: c8ja00171e2.xlsx [file c8ja00171e2.xlsx]

## Sheet: Sensitivities
		Sensitivities (cps/ppb) for selected isotopes, KED-mode
		Mg 24	Al 27	Ti 49	V 51	Cr 53	Mn 55	Fe 57	Co 59	Ni 61	Cu 65	Zn 67	As 75	Se 82	Cd 111	Pb 208	Be 9	Ga 69	Y 89	Rh 103	In 115	Ir 193	Tl 205
	1% HNO3	278.869	57.3399	26.8348	1044.07	225.469	875.614	51.9769	3587.04	50.5669	1436.24	41.5994	130.796	5.13947	493.849	6754.67	294.127	370.04	1774.82	9703.92	2108.82	11346.2	9860.53
	5% HNO3	349.014	74.9954	31.2933	1253.75	244.534	1050.59	42.6723	4301.21	57.8759	1647.01	36.1167	124.612	4.14636	509.268	7897.18	308.073	446.553	2171.14	11557.3	2525.91	13092.5	11583.4
	10% HNO3	438.254	105.005	35.7072	1465.7	284.77	1252.16	49.518	5024.19	61.3896	1847.69	36.3536	122.936	4.06798	532.22	9156.63	338.433	536.379	2587.74	13426.6	2978.56	14649.1	13440.1
	1% PBS	288.35	63.7068	27.9323	1108.21	205.52	887.242	35.75	3714.2	49.1332	1432.81	43.6985	144.779	6.03307	531.494	6779.93	324.255	373.742	1863.32	9753.24	2167.16	12115.7	9946.72
	5% PBS	253.618	56.2658	25.284	1041.22	194.843	793.183	33.9258	3342.95	44.17	1195.7	36.5435	127.746	4.64875	445.85	5864.59	290.97	325.706	1676.01	8368.58	1884.74	10756.2	8496
	10% PBS	248.216	48.9801	24.6178	984.589	176.087	734.153	31.7422	3081.15	40.562	1061.29	31.0516	119.13	4.31748	383.985	5167.3	251.871	297.762	1549.82	7457.52	1715.64	9645.82	7403.43
	0.1% Triton	352.891	72.1517	30.0152	1248.04	240.439	1064.73	43.7136	4387.84	58.9779	1797.64	51.3916	177.705	7.78454	625.158	8125.6	392.269	451.632	2156.73	11811.5	2570	13585.5	11787.9
	0.5% Triton	462.048	89.5479	37.4875	1616.87	315.791	1407.48	66.5326	5890.47	83.0214	2437.85	71.3305	291.712	13.5803	825.74	10743.7	569.731	618.126	2941.98	15997.4	3458.26	17703	15803.7
	1% Triton	503.186	122.145	41.5492	1766.77	336.595	1543.19	66.7325	6417.35	87.9247	2717.96	77.2245	397.427	17.9422	860.05	11531.5	642.267	695.236	3341.36	17783.4	3898.16	19097.6	17184.2
		Sensitivities (cps/ppb) for selected isotopes, DRC-mode
		Mg 24	Al 27	V 51	Cr 53	Mn 55	Fe 57	Co 59	Ni 61	Cu 65	Zn 67	As 75	Se 82	Cd 111	Pb 208	Ga 69	Rh 103	In 115	Tl 205
	1% HNO3	2777.29	4711.31	1718.36	896.773	12540.1	159.569	2890.93	62.0602	939.124	156.344	36.5034	51.1627	2119.44	9808.15	11642.4	12249.5	34197.7	12951
	5% HNO3	3432.99	6038.41	2151.99	996.561	15469.3	144.846	3657.56	69.5408	1118.84	145.603	39.918	51.3013	2226.1	11861.7	14229.5	15043	41723.5	15803.6
	10% HNO3	4399.74	8872.23	2795.58	1281.86	19608.4	185.646	4745.1	83.5289	1351.12	158.167	43.602	54.8798	2471.36	15085.4	17685.7	18820.4	52094.7	20195.6
	1% PBS	2805.1	5314.92	2039.22	884.272	13420.4	121.924	3072.31	60.7238	949.249	166.42	33.7823	57.4497	2294.8	10130.9	11971.2	12384.5	35671.9	13436.6
	5% PBS	2065.42	3799.96	2758.31	935.954	13064.2	133.305	3040.9	57.6967	821.948	142.75	31.1153	50.0424	1886.48	8634.79	10646.2	10408.3	30823.2	11450.8
	10% PBS	1811.9	3697.65	3223	908.461	12199.6	139.763	2959.03	55.5528	732.654	120.504	26.829	44.1974	1562.54	7452.69	9560.89	9115.04	27059.4	9854.22
	0.1% Triton	3518.19	6031.29	2288	1054.93	16356.1	154.373	3973.2	74.9078	1285.62	218.53	42.8708	77.1764	2878.69	12789.7	14876.2	16279.5	44129	17063.2
	0.5% Triton	4999.22	7308.81	3327.45	1484.81	23200.6	269.71	5861.53	110.081	1874.53	333.777	60.0664	142.932	4152.05	19142.3	21171.3	24674.2	65446.4	25875.3
	1% Triton	5787.54	9828.03	4343.23	1774.97	27047.3	314.013	7503.36	136.855	2394.35	390.291	68.9205	200.821	4728.84	22476	24723.7	30118.6	77104.4	30648.5
		Sensitivities (cps/ppb) for selected isotopes, Standard-mode
		Mg 24	Al 27	Ti 49	V 51	Cr 53	Mn 55	Co 59	Ni 61	Cu 65	Zn 67	As 75	Se 82	Cd 111	Pb 208	Be 9	Ga 69	Y 89	Rh 103	In 115	Ir 193	Tl 205
	1% HNO3	24695	31485.4	2449.7	38430.1	3971.84	43253.4	32636.9	332.655	6521.41	578.595	3251.02	411.751	4588.72	10465.7	19561.3	20948.4	55445.8	40103.6	52513.4	12361.8	15051.4
	5% HNO3	32602.7	44490.9	3117.22	48386.6	4527.28	54045.2	40716	372.943	7733.78	530.22	3287.5	357.14	4753.88	12535.7	19933.9	26204.3	68895.3	48674.9	62807.9	14511	18121.6
	10% HNO3	43290.4	62000.3	4020.22	62073.8	5664.15	68697.3	50923.2	444.028	9176.02	553.05	3425.87	351.451	5167.29	15540.9	21111.3	33164	87377.7	60684.9	77189.3	17694.8	22626.7
	1% PBS	27152.8	38293.6	2599.91	39816.8	3446.95	43601.3	33186.5	297.837	6267.33	589.269	3487.29	453.456	4810.57	10198.6	20705.5	20584	56052.4	38939.8	52437.2	13003.5	14765.5
	5% PBS	23324.8	30831.3	2381.6	36968	3240.76	38058	28895.4	261.429	5070.15	469.108	3004.64	370.979	3978.12	8416.33	18002.9	17484	50162.1	33118.2	45195.2	11139.2	12250.3
	10% PBS	18101.1	24291.4	2051.32	31304.5	2539.39	32482.2	25115.4	218.186	4252.29	381.666	2536.85	297.965	3169.81	6317.25	14888.8	15118.8	43408.4	27701.3	36934.3	8397.77	9193.27
	0.1% Triton	34624.6	47736.9	3155.39	48855.1	4545.56	55767.7	41987	387.508	8505.79	751.203	4614.69	636.385	5980.68	13147.3	25099	26911.5	69588.2	50404.1	64992.9	15588	19023.8
	0.5% Triton	57400.1	65939.7	5106.56	78550.6	7587.94	89268.3	67079.7	653.75	13817.5	1187.75	9179.9	1453.21	8711	20122.3	35610.1	43154	116303	83909.6	99020.9	23076.5	29180.5
	1% Triton	55431	76234.1	5671.1	88527.5	7183.34	100513	77036.9	722.772	16365.2	1302.7	13203.4	2008.67	9086.28	20695.2	39014.3	49835.4	134809	96318.9	107501	22548	30259
