# Supplementary material for: Internal standards in inductively coupled plasma mass spectrometry using kinetic energy discrimination and dynamic reaction cells
Source: Royal Society of Chemistry journal article supplement (doi:10.1039/c8ja00171e), 2018-01-01
Supplement: c8ja00171e3.xlsx [file c8ja00171e3.xlsx]

## Sheet: Sheet1
				Mode	STD	KED	DRC
				Nebulizer Gas Flow	0.97	0.97	0.97
				Auxiliary Gas Flow	1.2	1.2	1.2
				Plasma Gas Flow	15	15	15
				ICP RF Power	1600	1600	1600
				Analog Stage Voltage	-1825	-1825	-1825
				Pulse Stage Voltage	1050	1050	1050
				Discriminator Threshold	25	25	25
				Quadrupole Rod Offset	-5	-11.5	-10
				Cell Entrance Voltage	-3	-7	-6
				Cell Exit Voltage	-3	-40	-6
				Cell Rod Offset	-12	-18	-1
